# Supplementary material
Source: PubMed Central journal article supplement (PMC3030383)
Supplement: supp_M110.186981_jbc.M110.186981-1.pdf [file supp_M110.186981_jbc.M110.186981-1.pdf]

Fig. S1

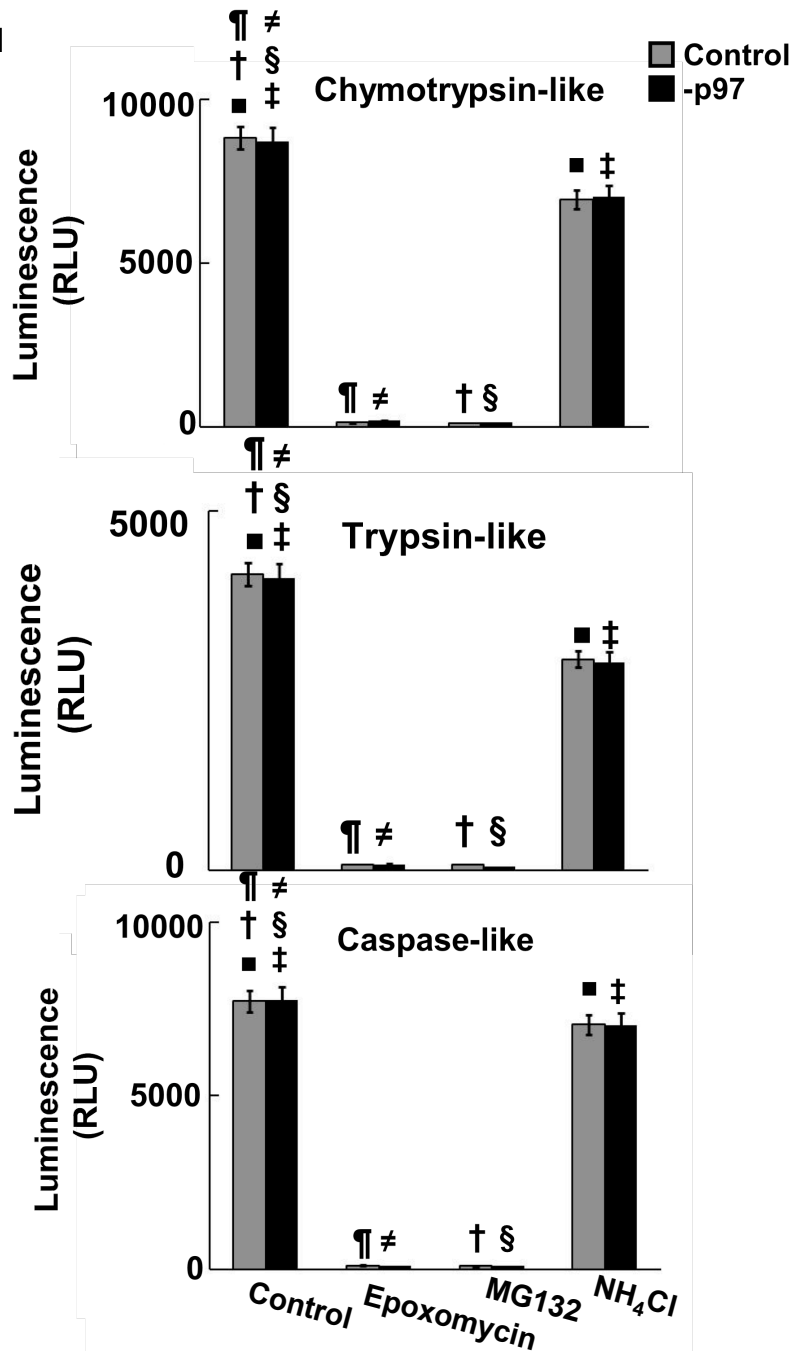

Fig. S2

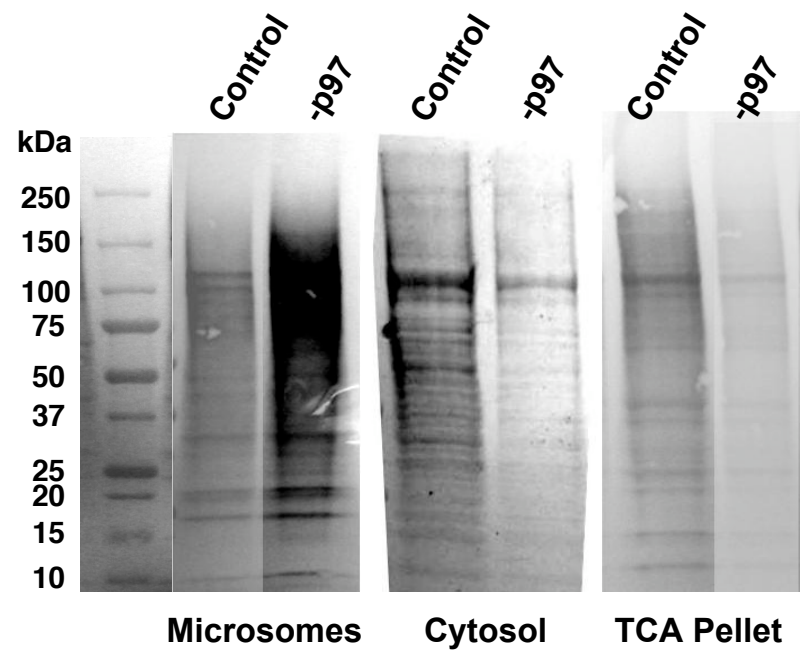

**Fig. S3**

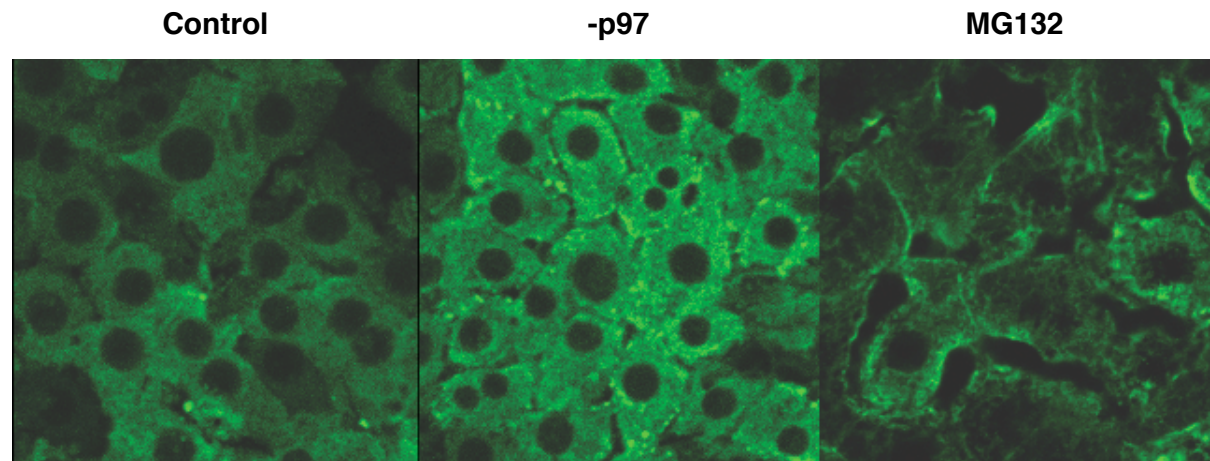

**Fig. S1. Relative contributions of hepatic proteasome and lysosomes to the chymotrypsin-like, trypsin-like and caspase-like activities of cultured rat hepatocytes as probed with specific inhibitors.** Cells were infected with control shRNA or p97 shRNA 1+2 (-p97) for 7 days, and on the 8<sup>th</sup> day the effects of p97 knockdown on hepatic proteasomal function were assessed with the specific probes for the proteasomal chymotrypsin-like, trypsin-like and caspase-like activities in a cell-based bioluminescent assay in the presence of a proteasomal inhibitor (MG132 or epoxomicin) or a lysosomal inhibitor (NH<sub>4</sub>Cl) as detailed (Experimental Procedures). Values are mean ± SD relative luminescence units (RLU) derived from three separate -p97 cultures relative to the values of corresponding activities in control shRNA treated cells. No statistically significant differences were observed between activities from control and -p97 cells. However, statistically significant differences were observed between the two mean ± SD values of activities each marked with the same symbol as follows: Chymotrypsin-like (≠), (¶), (†), and (§) at p<0.0001; (‡) and (■) at p<0.001. Trypsin-like (≠), (¶), (†), and (§) at p<0.0005; (‡) and (■) at p<0.001. Caspase-like (≠), (¶), (†), and (§) at p<0.0001; (‡) and (■) at p<0.005.

**Fig. S2. Relative levels of ubiquitinated proteins after p97 knockdown in cultured hepatocytes** Relative total hepatic protein ubiquitination analyses of microsomes (20 µg protein), cytosol (50 µg protein) and Na<sub>2</sub>CO<sub>3</sub>-solubilized material (50 µg protein) obtained from the cells described in Fig. 6A. A representative immunoblot developed with alkaline-phosphatase-conjugated secondary antibody is shown.

**Fig. S3. Confocal immunofluorescence microscopy of control, -p97 or MG132-treated rat hepatocytes: Comparative analyses.** Cells were infected with control shRNA or p97 shRNA 1+2 (-p97) for 7 days, and on the 8<sup>th</sup> day the effects of p97 knockdown were assessed as detailed (Experimental Procedures). Cells were also treated with the proteasomal inhibitor MG132 (300 µM) for 6 h as described (66). This treatment is known to trigger hepatic ER-stress, with consequent induction of PERK and GCN2 eIF2α kinases, and consequent translational shut-off of hepatic proteins. Thus even though proteasomal inhibition is expected to stabilize hepatic CYPs 3A, the CYP3A content of MG132-treated cells is reduced due to the concomitant ER-stress induced translational shut down. This is in clear contrast to the CYP3A stabilization observed in hepatocytes after -p97 knockdown.
